# Supplementary material
Source: PubMed Central journal article supplement (PMC4280327)

## Supplemental Methods.

*Osteogenic differentiation: Mineralization:* *In vitro* osteogenic differentiation was performed as previously described <sup>(S1-2)</sup>. Unless otherwise stated, reagents were sourced from Sigma Aldrich. Briefly, confluent monolayers were incubated for 21 days in CCM containing  $10^{-8}$  M dexamethasone,  $50 \mu\text{g mL}^{-1}$  ascorbic acid and 5 mM  $\beta$ -glycerol phosphate for 21 days with changes every 2 days. The monolayers were then fixed with formalin, washed in distilled water, and then stained with 40 mM Alizarin Red S (ARS) pH 4.0 to visualize calcified matrix. After a brief wash in distilled water, micrographs were taken using an inverted microscope (Nikon Eclipse, TE200) fitted with a Nikon DXM1200F digital camera. Quantification of differentiation was performed based on a previously described protocol <sup>(S1)</sup>. Briefly, ARS was recovered from the stained monolayers by 15 min incubation in 10% (v/v) acetic acid warmed to  $50^{\circ}\text{C}$ . The recovered ARS was then quantified by absorbance spectroscopy at 420 nm using a commercial microplate reader (Fluostar Omega, BMG Labtech, Cary NC).

*Alkaline phosphatase:* Assays of alkaline phosphatase (ALP) activity were performed as described previously <sup>(S3-4)</sup> using a colorimetric assay. Briefly, monolayers (in  $4 \text{ cm}^2$  12-well Corning plates) were washed in PBS, then in ALP reaction buffer (50 mM Tris-HCl pH 9.0 containing 100 mM KCl and 1 mM  $\text{MgCl}_2$ ). One half-mL ALP reaction buffer was added to each well followed by 0.5 mL of p-nitrophenol phosphate (PNPP) (Thermo Scientific, Rockford, IL). The conversion of PNPP to nitrophenolate was plotted by monitoring absorbance at 405 nm every 30 s using a commercial plate reader. After 10 min, the monolayers were washed with PBS and subjected to cell enumeration by a fluorescent DNA labeling assay based on Sytox dye incorporation <sup>(S4)</sup>. Briefly, monolayers were lysed by freezing, followed by the addition of PBS containing 0.1% (v/v) Triton X-100 and 2 units per mL of *EcoRI* and 2 units per mL of *HindIII* to release DNA from the dense monolayers. Plates were incubated in a humidified chamber at  $37^{\circ}\text{C}$

with rocking for 12-15 h then centrifuged at 1500 g for 15 min. Samples of solubilised, clarified lysate were diluted if necessary and mixed with 0.001 volumes of Sytox green dye (Life Technologies, Grand Island, NY). Cell number was ascertained by comparing fluorescence at 488ex/504em with known standards using a commercial plate reader.

*Osteoprotegerin assay:* ELISA assays were performed as previously described <sup>(S4)</sup> on conditioned media using a commercially available kit (OPG Duo-kit, R&D systems, Minneapolis, MN).

*Adipogenic differentiation:* *In vitro* adipogenic differentiation was performed as previously described <sup>(S2)</sup>. Briefly, confluent monolayers were incubated for 21 days in CCM supplemented with 0.5  $\mu$ M dexamethasone,  $5 \times 10^{-8}$  M isobutylmethylxanthine, and  $5 \times 10^{-7}$  M indomethacin (Sigma-Aldrich). Media were changed every 2 days. After 21 days, the adipogenic cultures were fixed in 10% (v/v) formalin and lipid deposits were stained with fresh 0.5% (w/v) oil red-O solution (Sigma) in 60 % (v/v) isopropanol in phosphate buffered saline (PBS) for 20 min. The monolayers were rinsed with PBS and visualized using an inverted microscope (Nikon Eclipse, TE200) fitted with a Nikon DXM1200F digital camera.

*Chondrogenic differentiation:* *In vitro* chondrocyte differentiation was performed as previously described <sup>(S5-6)</sup> on 250,000 pelleted cells. Briefly, cell pellets were incubated in high glucose Dulbecco's MEM containing  $10^{-7}$ M dexamethasone, 50  $\mu$ g mL<sup>-1</sup> ascorbate-2-phosphate, 40  $\mu$ g mL<sup>-1</sup> proline, 100  $\mu$ g mL<sup>-1</sup> pyruvate and ITS plus premix (Sigma-Aldrich) with media changes every 2-3 days. After 21 days, the pellets were washed in PBS and fixed in 4% (v/v)

paraformaldehyde, embedded in paraffin, sectioned, and then stained with toluidine blue to visualize proteoglycans and chondrocyte lacunae.

*Immunophenotyping:* MSCs were recovered by trypsinization and incubated with fluorophore-tagged antibodies or isotype controls (Becton Dickinson Pharmingen, Franklin Lakes, NJ or Beckman Coulter, Indianapolis, IN) for 30 min in PBS containing 2 % (v/v) FBS. After washing, at least 20,000 events were analyzed on a Cytomics FC500 flow cytometer (Beckman Coulter) and data were processed using the manufacturers' software (CXP, Beckman Coulter). The following clones were used: CD11b (clone BEAR1), CD14 (RMO52), CD19 (J3-119), CD29 (MAR4), CD34 (581), CD36 (FA6.152), CD44 (G44-26), CD45 (J.33), CD49a (SR84), CD49b (Gi9), CD49c (C3 II.1), CD49e (IIA1), CD51 (23C6), CD73 (AD2), CD79a (HM47), CD90 (Thy-1/310), CD105 (IG2), CD146 (TEA1/34), CD166 (3A6), HLA-A,B,C (G46-2.6), and HLA-DP,DQ,DR (Tu39).

*Carboxyfluorescein-succinimidyl-ester proliferation assay:* Discarded in-line filter sets were acquired from Scott and White Hospital Blood Center and peripheral blood mononuclear lymphocytes (PBLs) were isolated. Proliferation assays were performed as described previously<sup>(S7)</sup>. Human allogenic PBMCs were labeled with 2.5  $\mu$ M carboxyfluorescein diacetate, succinimidyl ester (CFSE; Molecular Probes/Invitrogen) according to the manufacturer's instructions. For each assay, 50,000 PBLs were co-cultured with 5,000 OEhMSCs in triplicates in RPMI 1640 medium (Gibco) supplemented with 10% human AB serum (Corning cellgro), 100 units  $\cdot$  mL<sup>-1</sup> penicillin G, and 100  $\mu$ g  $\cdot$  mL<sup>-1</sup> streptomycin for up to 7 days. As a positive control, lymphocyte expansion was stimulated by CD3/CD28 complexed Dynabeads (Gibco). Cultures

were analyzed on a Cytomics FC500 flow cytometer (Beckman Coulter) and data were processed using the manufacturers' software (CXP, Beckman Coulter).

*Quantitative RT-PCR (qRT-PCR) and microarray assays:* The number of OEhMSCs present on Gelfoam or BGF cultures was measured using qRT-PCR for glyceraldehyde-3-phosphate dehydrogenase (GAPDH). For this purpose, 0.25 cm<sup>3</sup> constructs were subjected to total RNA extraction using a commercially available kit (High Pure kit, Roche, Indianapolis, IN). One tenth of the total RNA generated was then used to synthesize cDNA (Superscript III kit, Invitrogen) and one tenth of the resultant cDNA was transferred to a single qRT-PCR reaction. A commercial PCR master mix (Evagreen, Biotium, Hayward, CA) was used with GAPDH-specific primers (**Table S1**)<sup>(S8)</sup>. Cells were enumerated by comparison with known OEhMSC standards. One-half µg cDNA was used for each reaction and relative BMP2 expression levels were calculated using the  $2^{-\Delta\Delta CT}$  method<sup>(S9)</sup>. The level of GAPDH transcription was employed to normalize measurements. For microarray assays, unless otherwise stated, all reagents were purchased from Affymetrix. A total of 2.0 µg RNA was used for assays. Briefly, double-stranded cDNA was synthesized using the One-Cycle cDNA Synthesis Kit and cleaned with the Sample Cleanup Module. Biotin-labeled cRNA was synthesized using the GeneChip IVT Labeling Kit and quantified spectrophotometrically (SmartSpec, Bio-Rad). Twenty-µg of biotin-labeled cRNA was hybridized to HG-U133 Plus 2.0 arrays with hybridization controls. After 16-h hybridization, the arrays were washed and stained in the Fluidics Station 450 using the GeneChip Hybridization Wash and Stain Kit. The arrays were then scanned using the GeneChip Scanner G7 and Command Console software. Transcripts of interest generated from the array data were confirmed using RT-PCR.

*Immunoblotting:* Immunoblotting was performed using Novex reagents (Invitrogen). Antibodies were mouse anti- $\beta$ -actin (AC-15, Sigma-Aldrich), rabbit-anti human type VI collagen (Novus Biologicals, Littleton, CO), rabbit-anti human type XII collagen (Novus), goat anti-mouse IgG-peroxidase conjugate (Biomedica, Foster, CA), goat anti-rabbit IgG-peroxidase conjugate (Biomedica).

**Supplemental tables:**

**Table S1: Primers used in this study.**

| <b>Target</b>             | <b>Sequence</b>                                                  | <b>Conditions</b>    | <b>Reference / notes</b>                                                    |
|---------------------------|------------------------------------------------------------------|----------------------|-----------------------------------------------------------------------------|
| <b>human GAPDH</b>        | FOR ctctctgctcctcctggttcgac<br>REV tgagcgatgtggctcggct           | SYBR-green<br>60°C   | (S8)<br>RTPrimerDB ID_1242*                                                 |
| <b>human collagen I</b>   | FOR gaacgcgtgtcatcccttgt<br>REV gaacgaggtagtctttcagcaaca         | SYBR-green<br>60°C   | RTPrimerDB ID_1089*<br>*marginal cross-reactivity detected in mock samples. |
| <b>human collagen III</b> | FOR gggaaacaacttgatgggtgctact<br>REV tcagacatgagagtgtttgtgcaa    | SYBR -<br>green 60°C | RTPrimerDB ID_4463*<br>*marginal cross-reactivity detected in mock samples. |
| <b>human collagen V</b>   | FOR cacaacttgctgatggaataaca<br>REV gcagggtacagctgcttgggt         | SYBR -<br>green 60°C | RTPrimerDB ID_1091*                                                         |
| <b>Human collagen VI</b>  | FOR ccatcgtgcgagcc<br>REV tgcgccgactcgtgc                        | SYBR -<br>green 60°C | n/a                                                                         |
| <b>human collagen XI</b>  | FOR gactatcccctcttcagaactgttaac<br>REV cttctatcaagtggtttcgtggttt | SYBR -<br>green 60°C | RTPrimerDB ID_1736*                                                         |
| <b>human collagen XII</b> | FOR cttccattgaggcagaagtt<br>REV agacacaagagcagcaatga             | SYBR -<br>green 60°C | (S10)                                                                       |
| <b>human collagen XV</b>  | FOR cgtgtagagatggctgga<br>REV gtttgggtggaggcagaag                | SYBR -<br>green 60°C | (S11)                                                                       |
| <b>human collagen XIV</b> | FOR tccgaggaatggtataaccgg<br>REV tggaccaggaactgacagg             | SYBR -<br>green 60°C | (S12)                                                                       |
| <b>human BMP2</b>         | FOR cccagcgtgaaaagagagac<br>REV gagaccgcagtcctgcttaag            | SYBR-green<br>55°C   | Generated by the Oligo Perfect™ algorithm (Invitrogen)                      |

**Table S2: Transcriptional up-regulation of secreted osteogenic ligands by OEhMSCs upon adherence to BGF.**

| <b>Gene</b>                                                     | <b>Accession</b> | <b>Entrez Number</b> | <b>Fold Change<br/>(multiple entries<br/>refer to alternative<br/>probe sets)</b> |
|-----------------------------------------------------------------|------------------|----------------------|-----------------------------------------------------------------------------------|
| <b>BMP2</b>                                                     | NM_001200        | 650                  | <b>18.35</b>                                                                      |
| <b>Cartilage oligomeric matrix protein</b>                      | NM_000095        | 1311                 | <b>13.86</b>                                                                      |
| <b>BMP8B</b>                                                    | NM_001720        | 656                  | <b>9.28</b>                                                                       |
| <b>BMP6</b>                                                     | AI123471         | 654                  | <b>8.69</b>                                                                       |
| <b>Collagen V <math>\alpha</math>3</b>                          | AI984221         | 50509                | <b>7.08, 5.79</b>                                                                 |
| <b>Collagen X <math>\alpha</math>1</b>                          | AI376003         | 1300                 | <b>5.16, 3.26</b>                                                                 |
| <b>Periostin</b>                                                | AY140646         | 10631                | <b>5.06, 2.63, 2.13</b>                                                           |
| <b>Wnt 2B</b>                                                   | AB045117         | 7482                 | <b>4.88</b>                                                                       |
| <b>Parathyroid hormone like hormone</b>                         | J03580           | 5744                 | <b>4.27</b>                                                                       |
| <b>Collagen VI <math>\alpha</math>1</b>                         | M20776           | 1291                 | <b>4.19</b>                                                                       |
| <b>Latent transforming growth factor beta binding protein 3</b> | BF059064         | 4054                 | <b>3.73</b>                                                                       |
| <b>Collagen III <math>\alpha</math>1</b>                        | AU146808         | 1281                 | <b>3.77</b>                                                                       |
| <b>BMP1</b>                                                     | AF318323         | 649                  | <b>3.62</b>                                                                       |
| <b>Collagen XI <math>\alpha</math>1</b>                         | NM_001854        | 1301                 | <b>3.21, 2.74</b>                                                                 |
| <b>BMP5</b>                                                     | AL133386         | 653                  | <b>2.85</b>                                                                       |
| <b>Alkaline phosphatase</b>                                     | S76738           | 249                  | <b>2.66</b>                                                                       |
| <b>Collagen I <math>\alpha</math>2</b>                          | AA628535         | 1278                 | <b>2.65</b>                                                                       |
| <b>Collagen I <math>\alpha</math>1</b>                          | AI743621         | 1277                 | <b>2.35</b>                                                                       |
| <b>BMP 4</b>                                                    | D30751           | 652                  | <b>2.06</b>                                                                       |
| <b>Matrix metalloproteinase 13</b>                              | NM_002427        | 4322                 | <b>2.14</b>                                                                       |
| <b>Fibroblast growth factor 18</b>                              | AI798863         | 8817                 | <b>2.2</b>                                                                        |
| <b>Osteomodulin</b>                                             | AI765819         | 4958                 | <b>2.02</b>                                                                       |

**Table S3: Transcriptional up-regulation of secreted angiogenic ligands by OEhMSCs upon adherence to BGF.**

| <b>Gene</b>                             | <b>Accession</b> | <b>Entrez Number</b> | <b>Fold Change<br/>(multiple entries<br/>refer to alternative<br/>probe sets)</b> |
|-----------------------------------------|------------------|----------------------|-----------------------------------------------------------------------------------|
| <b>Endothelin 1</b>                     | NM_001955        | 1906                 | <b>8.51</b>                                                                       |
| <b>Fibroblast growth factor 1</b>       | X59065           | 2246                 | <b>5.05, 2.91, 2.15</b>                                                           |
| <b>Fibroblast growth factor 9</b>       | AL583692         | 2254                 | <b>4.75</b>                                                                       |
| <b>Transforming growth factor beta1</b> | NM_000660        | 7040                 | <b>4.41</b>                                                                       |
| <b>Transforming growth factor alpha</b> | M31172           | 7039                 | <b>3.87</b>                                                                       |
| <b>Transforming growth factor beta2</b> | NM_003238        | 7042                 | <b>2.52</b>                                                                       |
| <b>Placental growth factor</b>          | AK023843         | 5228                 | <b>2.34</b>                                                                       |
| <b>Thrombospondin 1</b>                 | AW956580         | 7057                 | <b>2.11</b>                                                                       |



### **Supplemental References.**

- S1. Gregory CA, Gunn WG, Peister A, Prockop DJ. An Alizarin red-based assay of mineralization by adherent cells in culture: comparison with cetylpyridinium chloride extraction. *Anal Biochem.* 2004 Jun 1;329(1):77-84.
- S2. Gregory CA, Prockop DJ. Fundamentals of Culture and Characterization of Mesenchymal Stem/Progenitor Cells (MSCs) from Bone Marrow Stroma. In: Freshney RIS, Stacey GN and Auerbach JM, editors. *Culture of Human Stem Cells.* Hoboken NJ: Wiley-Liss; 2007. p. 208.
- S3. Krause U, Harris S, Green A, et al. Pharmaceutical modulation of canonical Wnt signaling in multipotent stromal cells for improved osteoinductive therapy. *Proc Natl Acad Sci U S A.* 2010 Mar 2;107(9):4147-52.
- S4. Krause U, Seckinger A, Gregory CA. Assays of osteogenic differentiation by cultured human mesenchymal stem cells. *Methods Mol Biol.* 2011;698:215-30.
- S5. Sekiya I, Colter DC, Prockop DJ. BMP-6 enhances chondrogenesis in a subpopulation of human marrow stromal cells. *Biochem Biophys Res Commun.* 2001 Jun 8;284(2):411-8.
- S6. Sekiya I, Vuoristo JT, Larson BL, Prockop DJ. In vitro cartilage formation by human adult stem cells from bone marrow stroma defines the sequence of cellular and molecular events during chondrogenesis. *Proc Natl Acad Sci U S A.* 2002 Apr 2;99(7):4397-402.
- S7. Lyons AB, Parish CR. Determination of lymphocyte division by flow cytometry. *J Immunol Methods.* 1994 May;171(1):131-7.
- S8. Carraro G, Albertin G, Forneris M, Nussdorfer GG. Similar sequence-free amplification of human glyceraldehyde-3-phosphate dehydrogenase for real time RT-PCR applications. *Mol Cell Probes.* 2005 Jun;19(3):181-6.

- S9. Livak KJ, Schmittgen TD. Analysis of relative gene expression data using real-time quantitative PCR and the 2(-Delta Delta C(T)) Method. *Methods*. 2001 Dec;25(4):402-8.
- S10. Nemoto T, Kajiya H, Tsuzuki T, Takahashi Y, Okabe K. Differential induction of collagens by mechanical stress in human periodontal ligament cells. *Arch Oral Biol*. 2010 Dec;55(12):981-7.
- S11. Lisignoli G, Codeluppi K, Todoerti K, et al. Gene array profile identifies collagen type XV as a novel human osteoblast-secreted matrix protein. *J Cell Physiol*. 2009 Aug;220(2):401-9.
- S12. Schmidt A, Lorkowski S, Seidler D, Breithardt G, Buddecke E. TGF-beta1 generates a specific multicomponent extracellular matrix in human coronary SMC. *Eur J Clin Invest*. 2006 Jul;36(7):473-82.

### Supplemental Figure legends.

**Fig. S1. Generation of the femoral segmental defect model in mice.** **Panel A:** Photographs of the pin assembly compared to a standard murine femur (above). **Panel B:** pin assembly after installation. **Panel C:** Pin assembly with associated GF collar. **Panel D:** reconstruction of  $\mu$ CT scan of installed pin demonstrating penetration of the trabecular bone. **Panel E-H:** Photographs of procedure and radiography of live mouse harboring pin.

**Fig. S2. Characterization of representative hMSC preparation used in this study.** **Panel A:** Flow cytometry of hMSCs demonstrating typical immunoprofile. **Panel B-D:** Mineralized monolayers stained with alizarin red S at low (**panel B**) and high (**panel C**) power compared with a non-stimulated control culture (**panel D**). **Panel E-G:** Adipocyte monolayers stained with oil red O at low (**panel E**) and high (**panel F**) power compared with a non-stimulated control culture (**panel G**). **Panel H-I:** toluidine-blue stained sections of chondrocyte micro-mass cultures demonstrating purple deposits of sulphated proteoglycan around lacunae.

**Fig. S3. Representative three dimensional reconstructions of murine femora that received a pin-stabilized segmental defect treated with hMSCs (**panel A**) or OEhMSCs (**panel B**).** The images at *left* and *center* indicate the pin in blue and the bone at 80% (*left*) and 20% (*center*) opacity and the images on the *right* present the bone at 100% opacity in the absence of the pin.

**Fig. S4. Polar moment of inertia measurements at the proximal and distal ends of femoral defects treated with OEhMSCs and hMSCs in the absence of solid scaffold (values are generated by taking the mean of 3 adjacent axial images). Statistical testing was performed by ANOVA and Tukey post-test. *P*-values key:  $P < 0.05 = *$ ,  $P < 0.01 = **$ .**

**Fig. S5.** Polar moment of inertia measurements at the proximal and distal ends of femoral defects treated with OEhMSCs and hMSCs in the presence of BGF or GF. (values are generated by taking the mean of 3 adjacent axial images). Statistical testing was performed by ANOVA and Tukey post-test. *P*-values key:  $P < 0.01 = **$ ,  $P < 0.005 = ***$ .

**Fig. S6.** Representative three dimensional reconstructions of murine femora that received a pin-stabilized segmental defect treated with BGF and OEhMSCs. **Panel A and B** are renderings of specimens that had fully bridged the defects whereas **panel C and D** are representative specimens with incomplete bridging. The images at *left* and *center* indicate the pin in blue and the bone at 80% (*left*) and 20% (*center*) opacity and the images on the *right* present the bone at 100% opacity in the absence of the pin.

**Fig. S7.** Diagrammatic summary of receptor/ligand complexes that are transcriptionally up-regulated by OEhMSCs upon attachment to BGF as compared to GF. Red stars indicate up-regulated genes. Data generated by the DAVID software suite utilizing the KEGG database.

**Fig. S8.** Diagrammatic summary of signal transduction pathways with components that are transcriptionally up-regulated by OEhMSCs upon attachment to BGF as compared to GF. Red stars indicate up-regulated genes. Data generated by the DAVID software suite utilizing the KEGG database.

Fig. S1

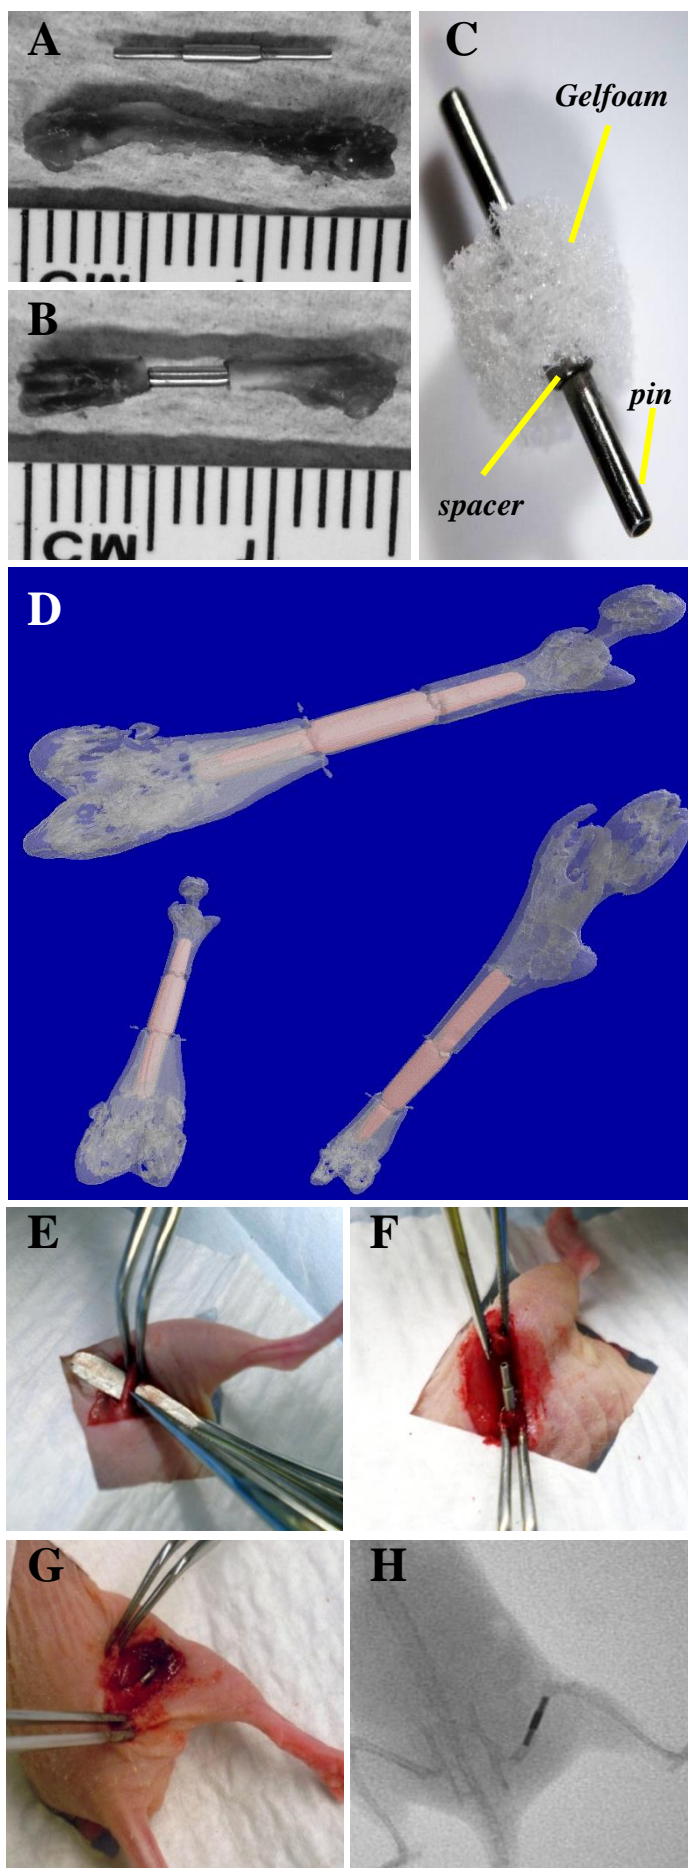



Fig. S2

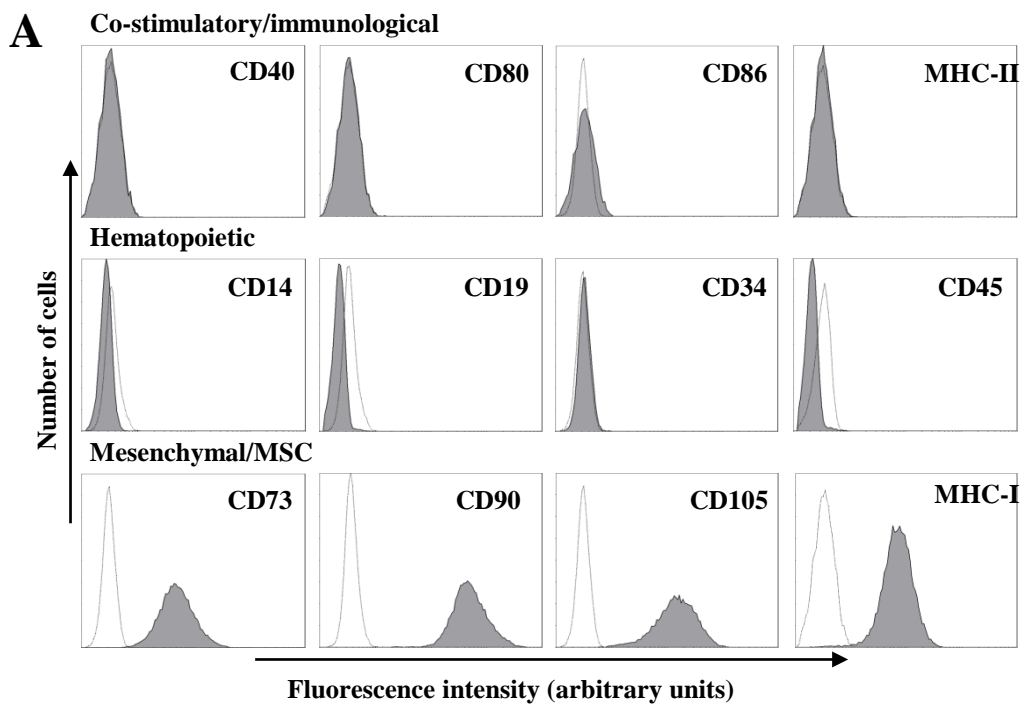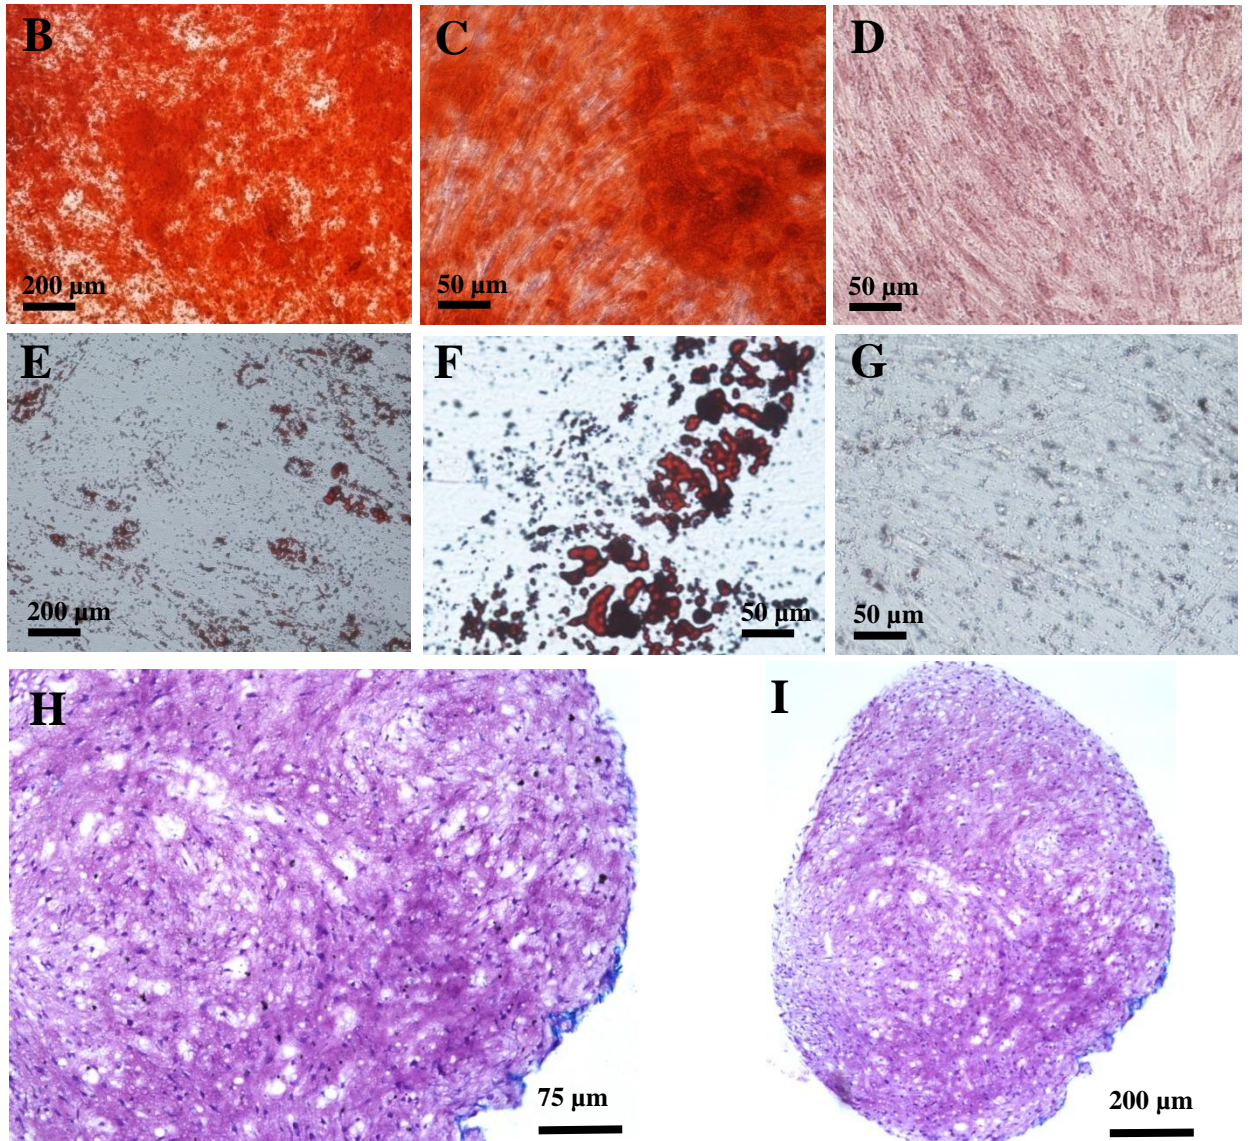

Fig. S3

|               |      |      |      |
|---------------|------|------|------|
| bone opacity: | 80%  | 20%  | 100% |
| pin opacity:  | 100% | 100% | 0%   |

**A**

**OEHMSCs,  
no matrix**

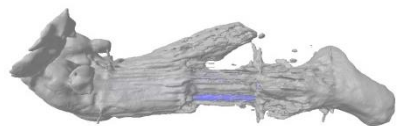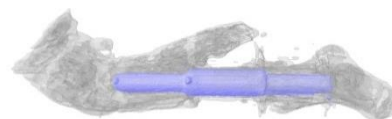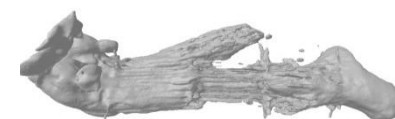

**B**

**hMSCs,  
no matrix**

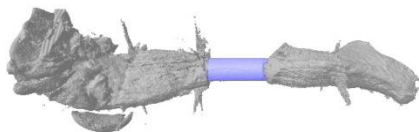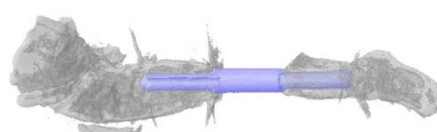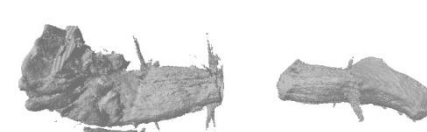

Fig. S4

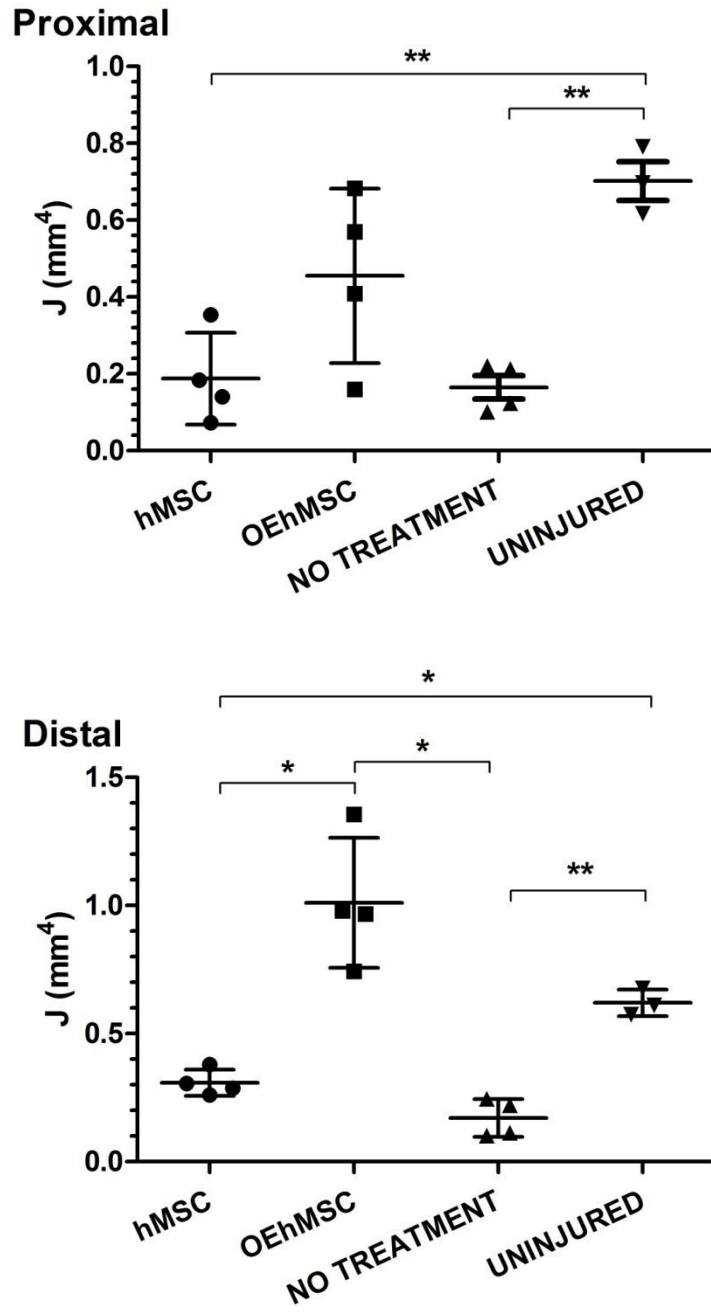



Fig. S5

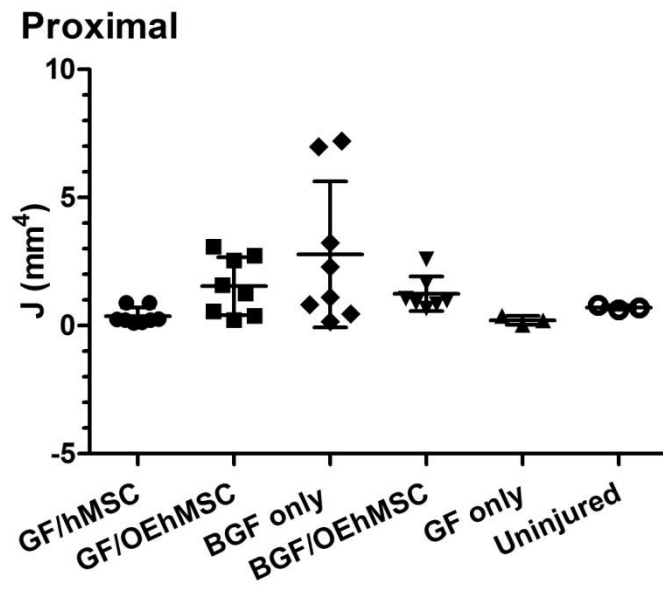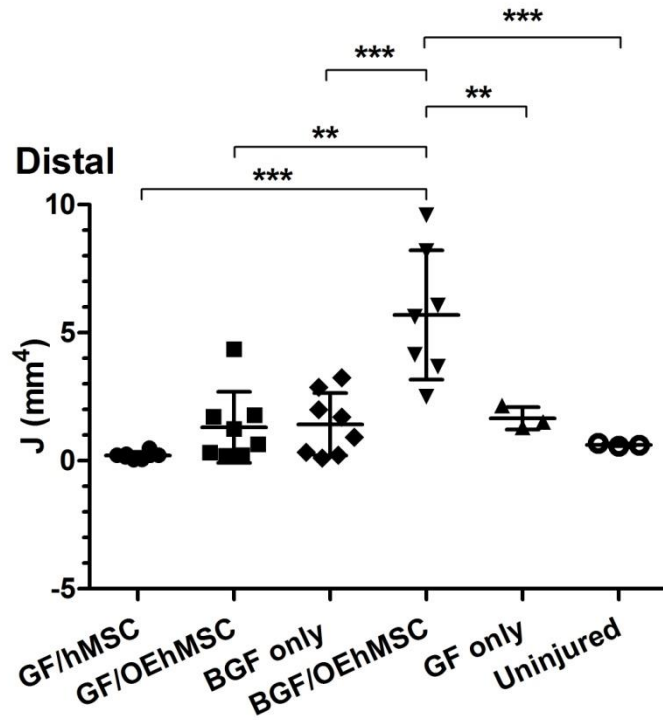

Fig. S6

|               |      |      |      |
|---------------|------|------|------|
| bone opacity: | 80%  | 20%  | 100% |
| pin opacity:  | 100% | 100% | 0%   |

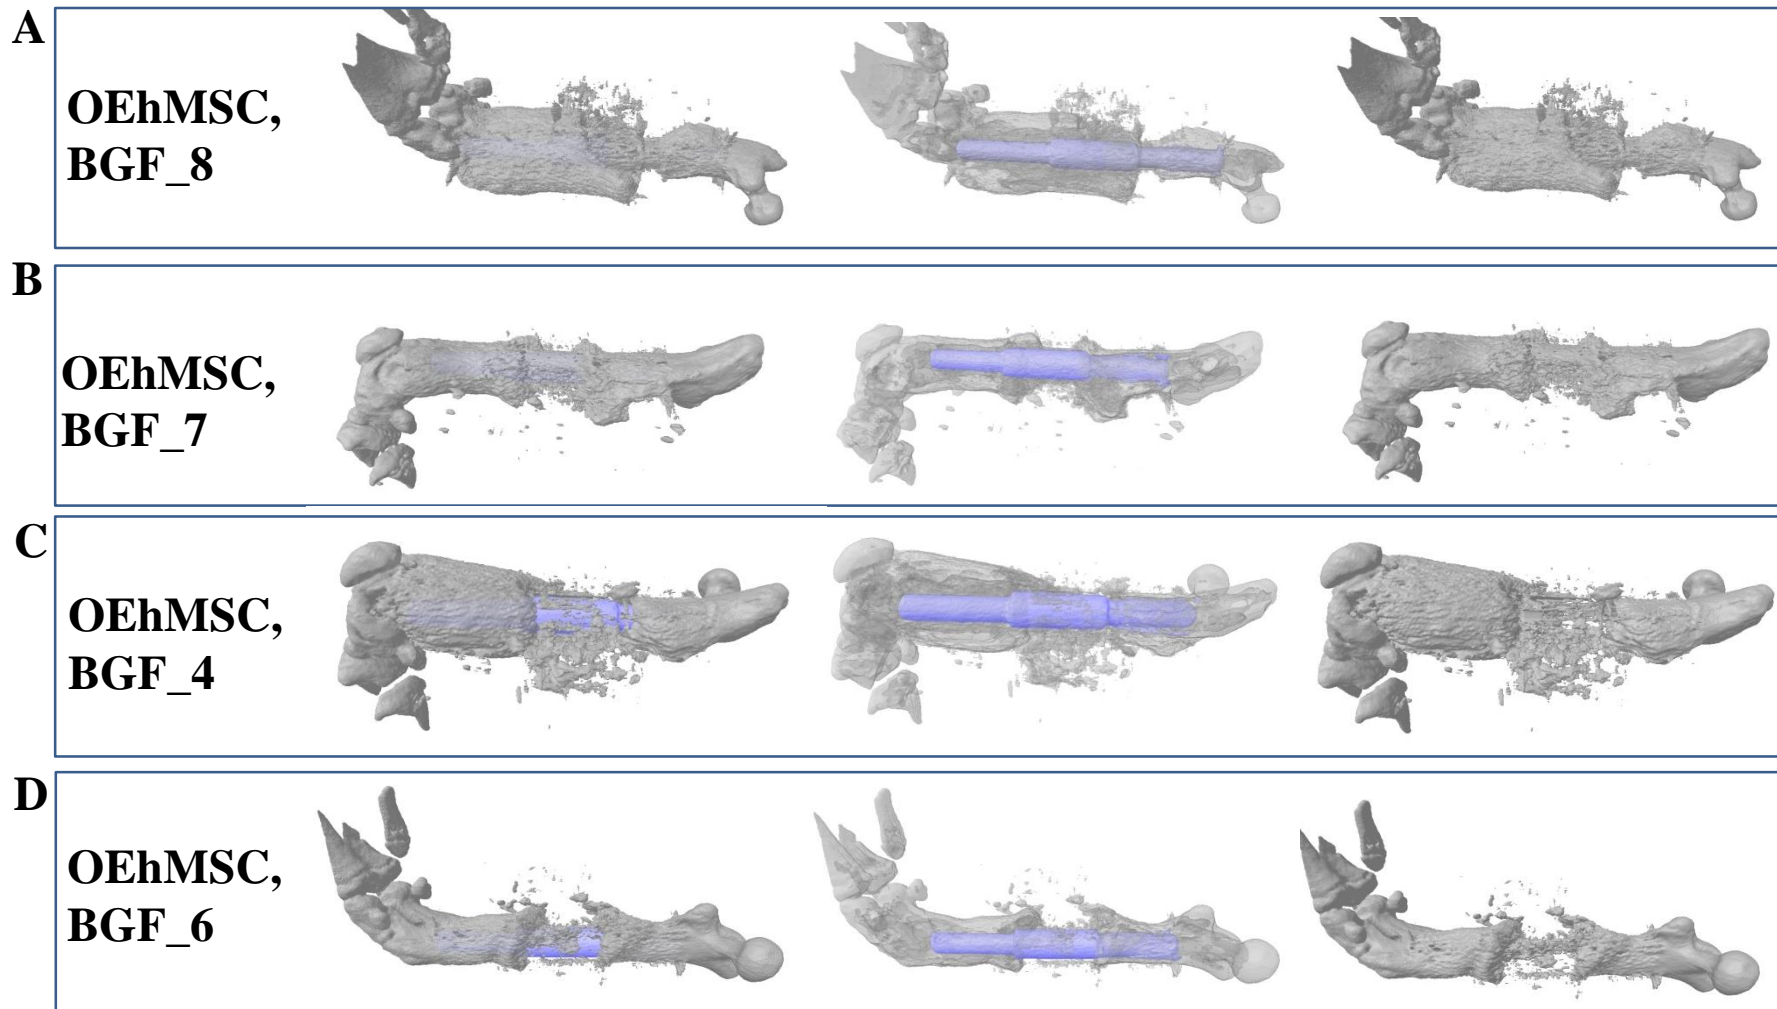

Fig. S7

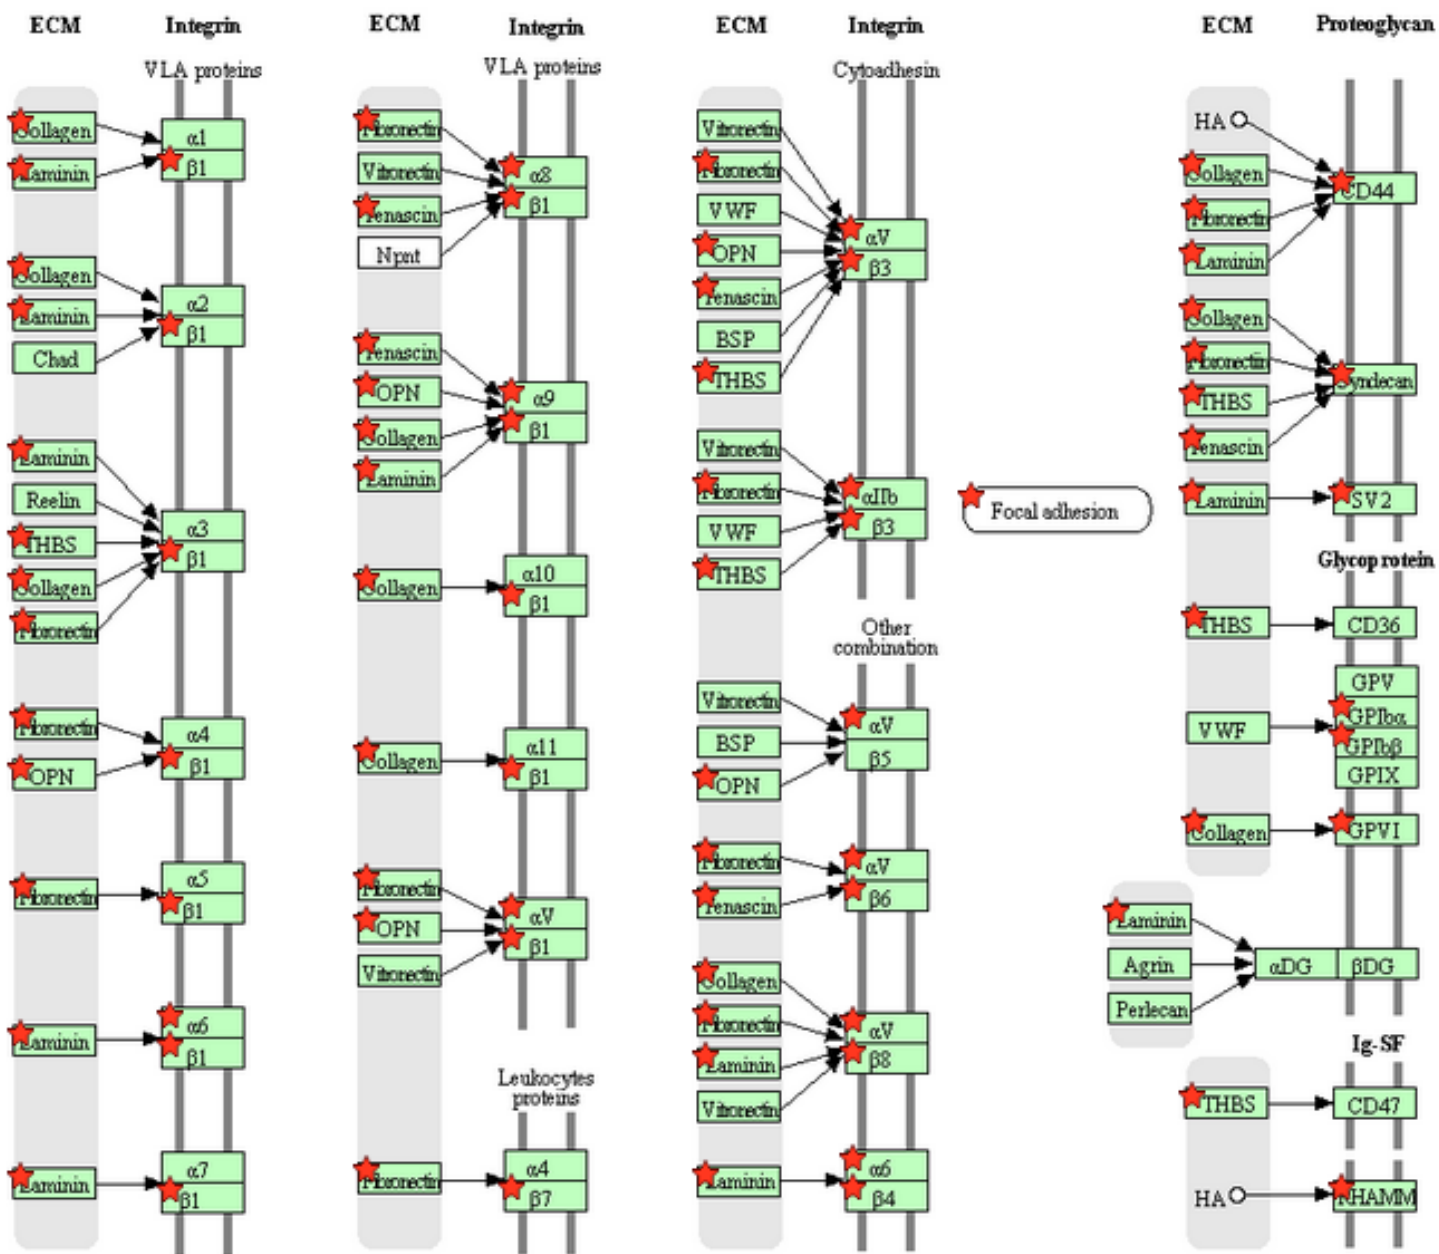

Fig. S8

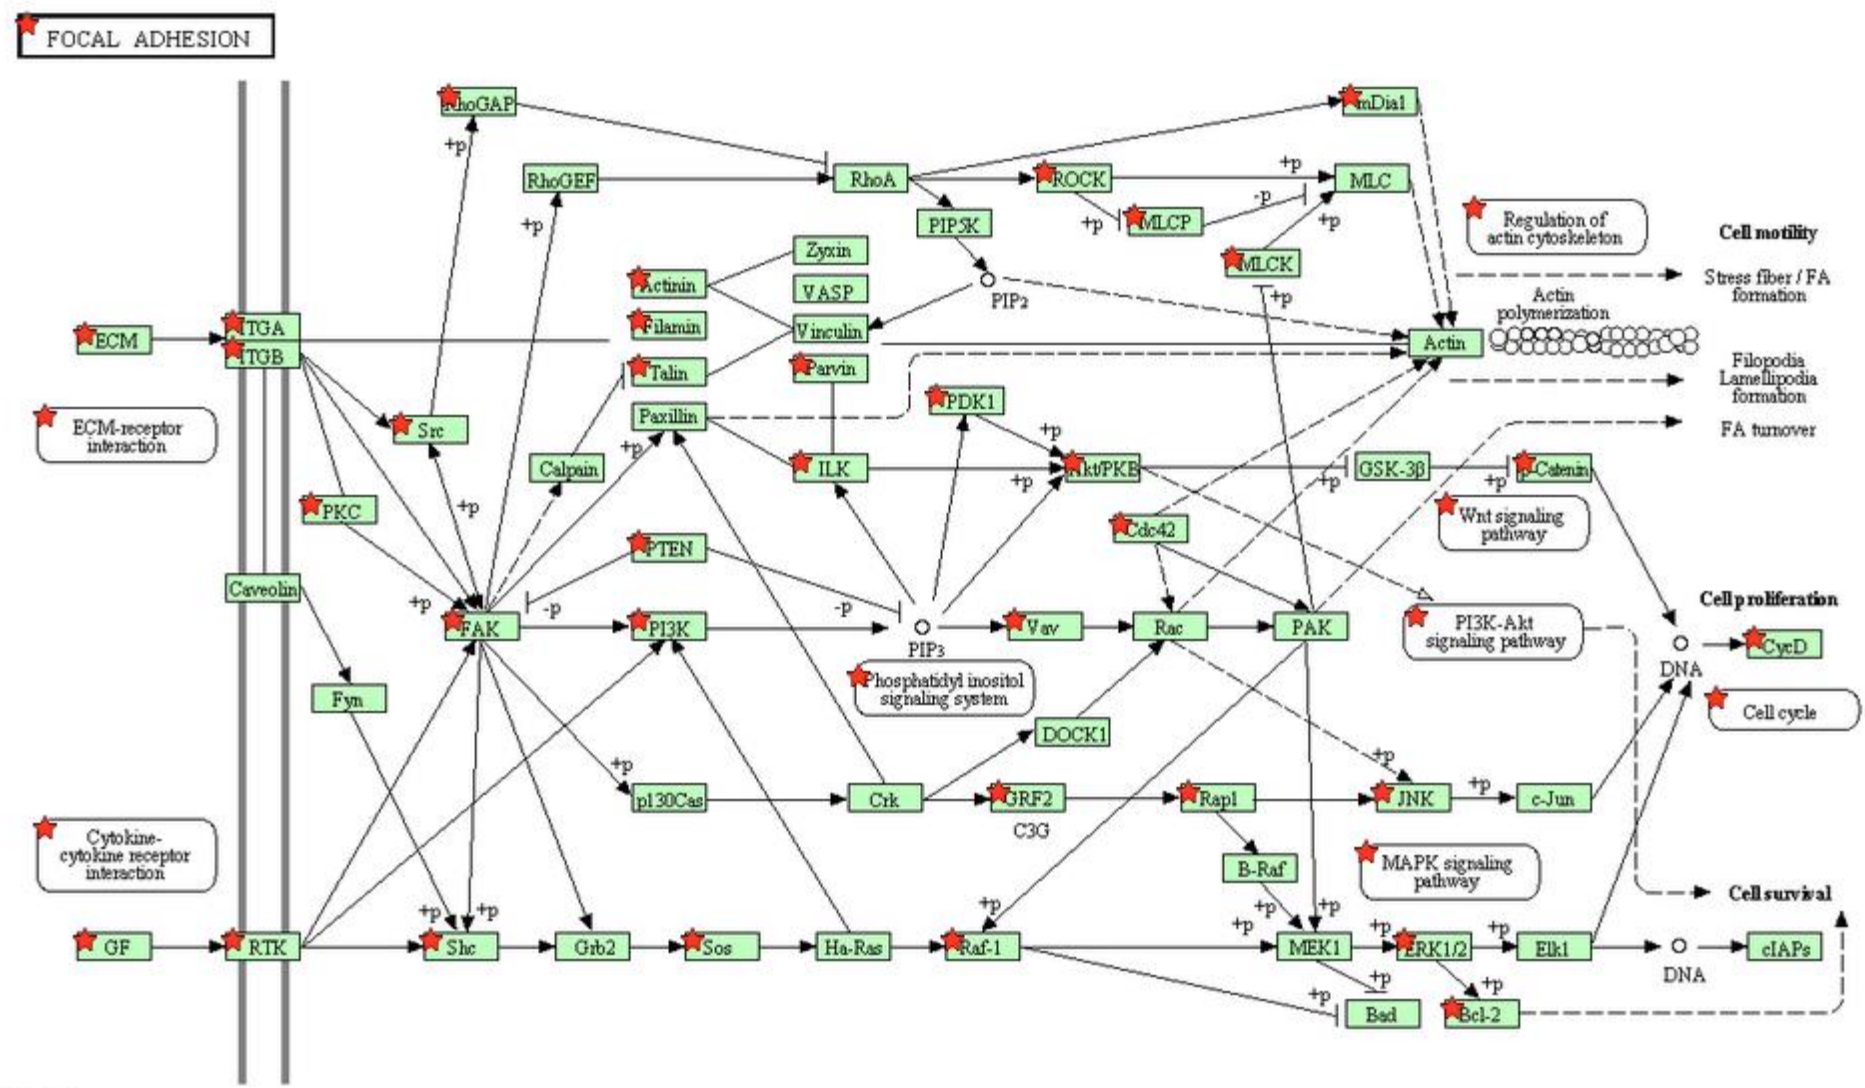

Supplement: NIHMS638055-supplement-Supp_Material.pdf [file NIHMS638055-supplement-Supp_Material.pdf]
